# Supplementary material for: MiR‐130a‐3p regulates neural stem cell differentiation in vitro by targeting Acsl4
Source: PubMed Central journal article supplement (PMC9077303; doi:10.1111/jcmm.17285), 2022-04-16

A

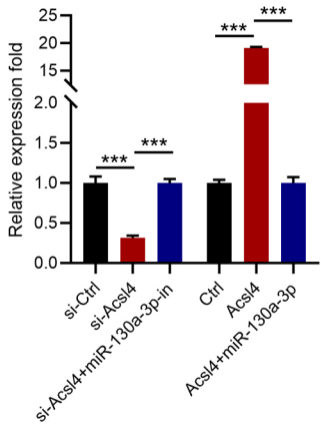

B

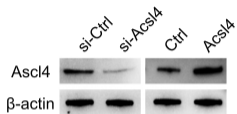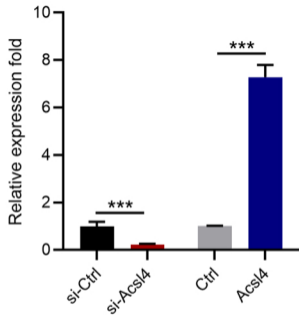

Supplement: JCMM-26-2717-s003.pdf [file JCMM-26-2717-s003.pdf]
